# Supplementary material for: Dual Targeting with Cell Surface Electrical Charge and Folic Acid via Superparamagnetic Fe3O4@Cu2–xS for Photothermal Cancer Cell Killing
Source: Cancers (Basel). 2021 Oct 21;13(21):5275. doi: 10.3390/cancers13215275 (PMC8582571; doi:10.3390/cancers13215275)
Supplement: Supplementary file 1 [file cancers-13-05275-s001.zip › cancers-1397736-supplementary.pdf]

# Supplemental Materials: Dual Targeting with Cell Surface Electrical Charge and Folic Acid via Superparamagnetic $\text{Fe}_3\text{O}_4@\text{Cu}_{2-x}\text{S}$ for Photothermal Cancer Cell Killing

- <sup>1</sup> The Materials Science and Engineering Program, College of Engineering and Applied Science, University of Cincinnati, Cincinnati, OH 45221, USA; dengzh@mail.uc.edu (Z.D.); lin2jo@mail.uc.edu (J.L.); webstebe@mail.uc.edu (B.W.)
- <sup>2</sup> Center for Lung Regenerative Medicine, Cincinnati Children's Hospital Medical Center, 3333 Burnet Avenue, Cincinnati, OH 45229, USA
- <sup>3</sup> Division of Pulmonary Biology, Cincinnati Children's Hospital Medical Center, 3333 Burnet Avenue, Cincinnati, OH 45229, USA; tatiana.kalin@cchmc.org
- <sup>4</sup> Division of Materials Science and Engineering, Ames Laboratory, Ames, IA 50011, USA; budko@ameslab.gov
- <sup>5</sup> Department of Pediatrics, College of Medicine, University of Cincinnati and Cincinnati Children's Hospital Medical Center, 3333 Burnet Avenue, Cincinnati, OH 45229, USA
- \* Correspondence: Vladimir.Kalinichenko@cchmc.org (V.V.K.); donglu.shi@uc.edu (D.S.)

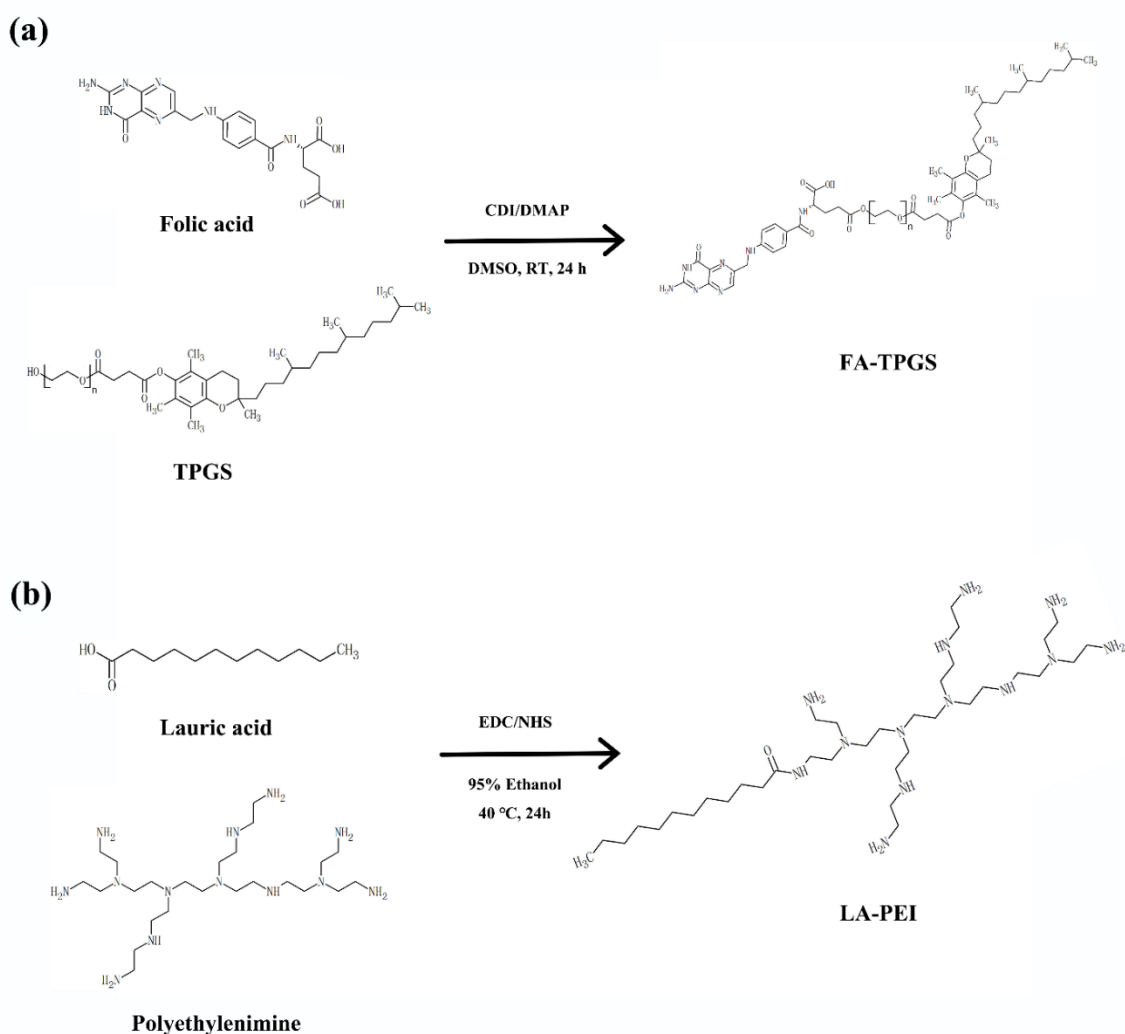

**Figure S1.** The chemical structures and synthesis procedures of (a) FA-TPGS and (b) LA-PEI.

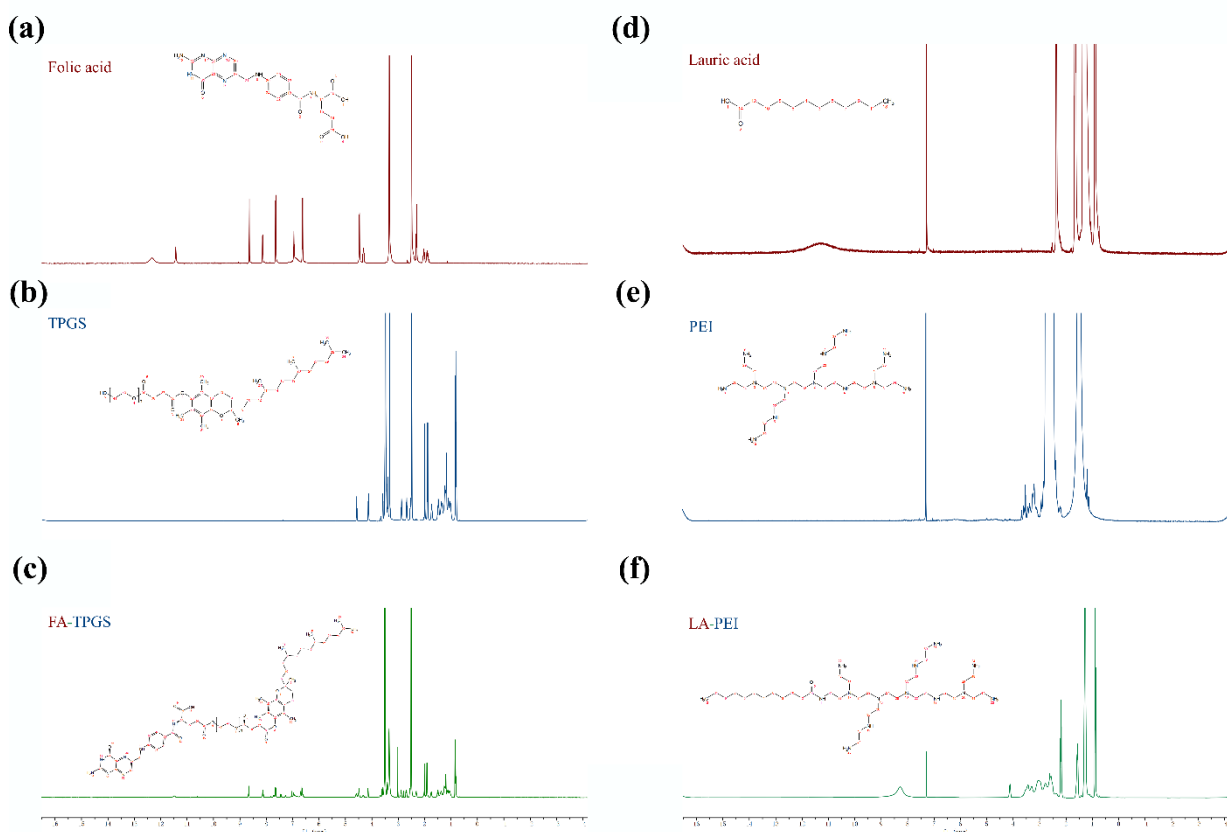

**Figure S2.**  $^1\text{H}$ -NMR characterization of the coating polymers (a) Folic acid, (b) TPGS, (c) FA-TPGS in DMSO- $\text{d}_6$ , (d) Lauric acid, and (e) PEI, and (f) LA-PEI in Chloroform- $\text{d}$ .

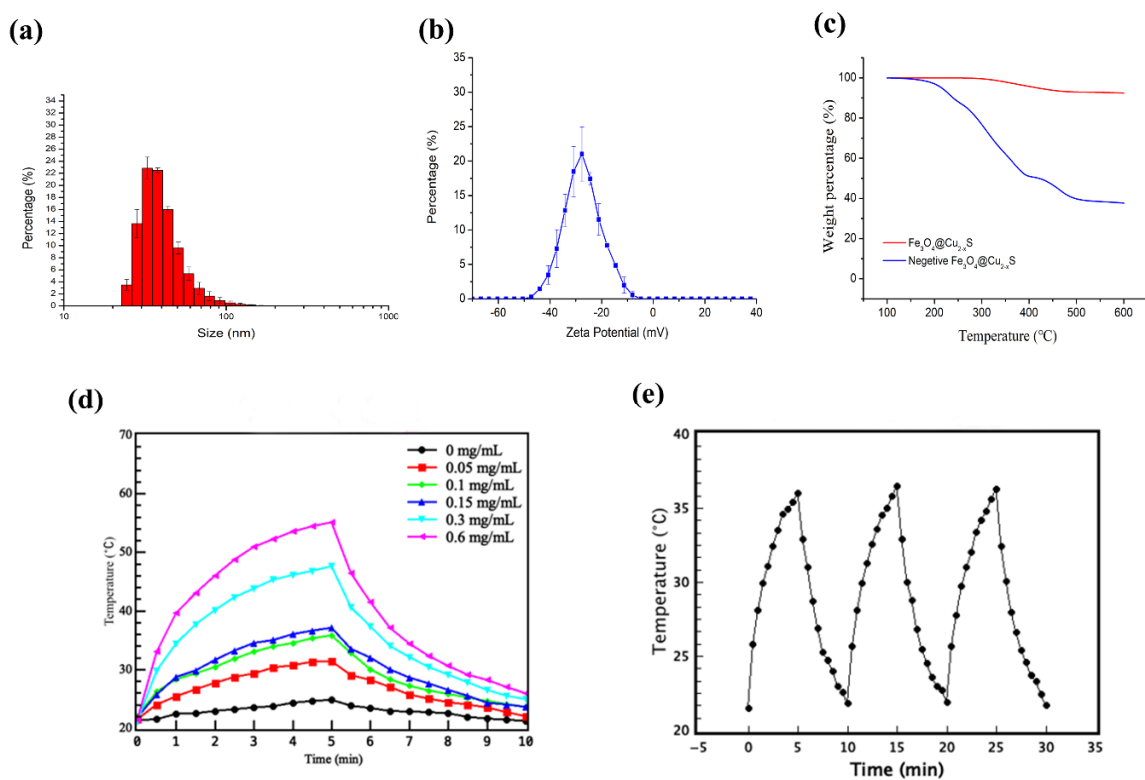

**Figure S3.** (a) Size distribution of the negative  $\text{Fe}_3\text{O}_4@\text{Cu}_{2-x}\text{S}$  nanoparticle, (b) surface zeta potential of negative  $\text{Fe}_3\text{O}_4@\text{Cu}_{2-x}\text{S}$ , (c) thermogravimetric analysis (TGA) curves of uncoated  $\text{Fe}_3\text{O}_4@\text{Cu}_{2-x}\text{S}$  and negative  $\text{Fe}_3\text{O}_4@\text{Cu}_{2-x}\text{S}$ , (d) temperature vs. time for different concentrations of the nanoparticles, and (e) temperature vs. time for a single cycle.

time curves for negative  $\text{Fe}_3\text{O}_4@\text{Cu}_{2-x}\text{S}$ , and (e) temperature vs. time curves of negative  $\text{Fe}_3\text{O}_4@\text{Cu}_{2-x}\text{S}$  for three on/off cycles.

**Table S1.** Photothermal conversion efficiencies of negative  $\text{Fe}_3\text{O}_4@\text{Cu}_{2-x}\text{S}$ , PEI- $\text{Fe}_3\text{O}_4@\text{Cu}_{2-x}\text{S}$ , and FA-PEI- $\text{Fe}_3\text{O}_4@\text{Cu}_{2-x}\text{S}$  at concentration of 0.15 mg/mL.

|        | FA-PEI- $\text{Fe}_3\text{O}_4$ | Negative $\text{Fe}_3\text{O}_4@\text{Cu}_{2-x}\text{S}$ | FA-PEI- $\text{Fe}_3\text{O}_4@\text{Cu}_{2-x}\text{S}$ |
|--------|---------------------------------|----------------------------------------------------------|---------------------------------------------------------|
| $\eta$ | 22.99                           | 16.46                                                    | 52.17                                                   |

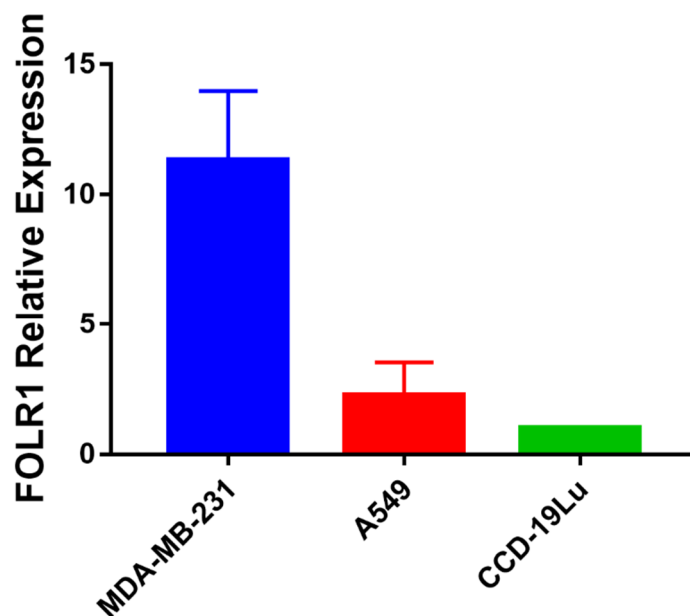

**Figure S4.** FOLR1 expression levels in different cell lines. Human *FOLR1* mRNA levels in tumor cells were measured by qRT-PCR and normalized to Beta-Actin mRNA.

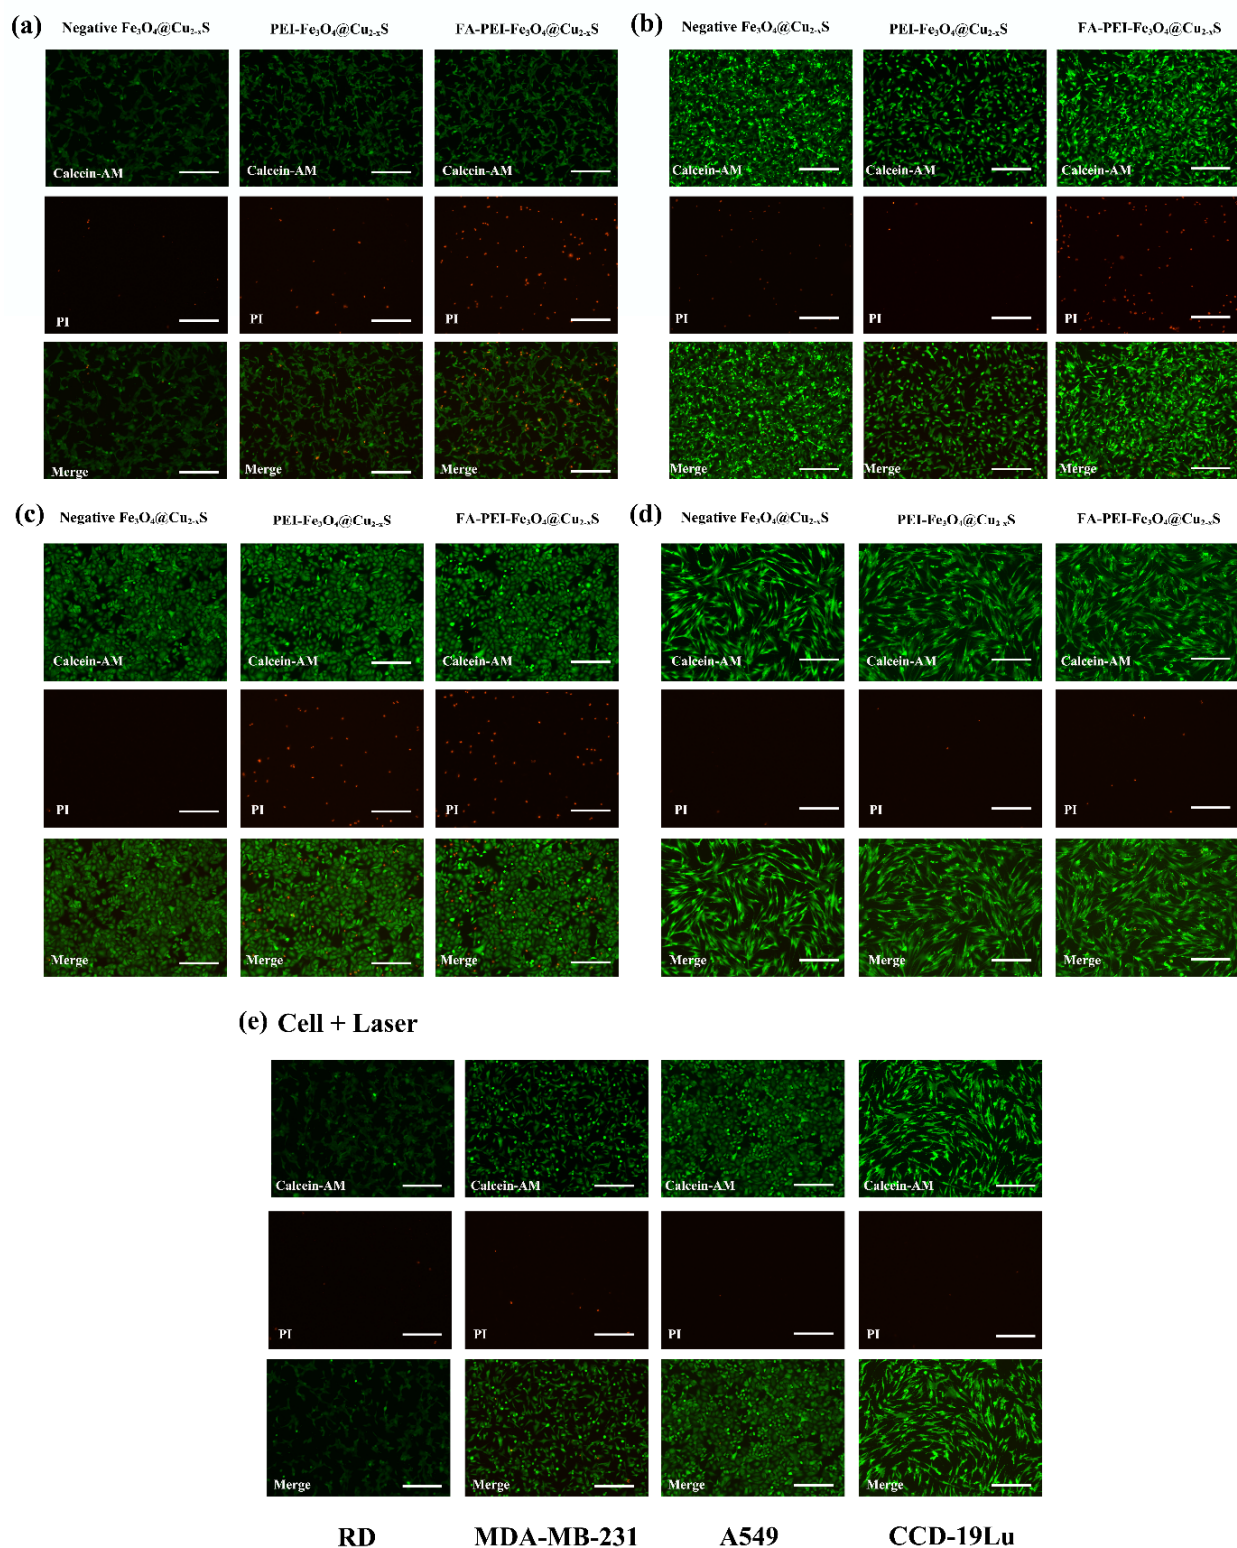

**Figure S5.** In vitro toxicity of negatively-charged  $\text{Fe}_3\text{O}_4@\text{Cu}_{2-x}\text{S}$ , positively-charged  $\text{PEI-Fe}_3\text{O}_4@\text{Cu}_{2-x}\text{S}$ , and  $\text{FA-PEI-Fe}_3\text{O}_4@\text{Cu}_{2-x}\text{S}$  at 0.32 mg/mL on (a) RD 769 cell line, (b) MDA-MB-231 cell line, (c) A549 cell line, (d) CCD-19Lu cell line without laser, and (e) 5 minute  $2 \text{ W cm}^{-2}$  808 nm laser irradiation treatment for different cells without nanoparticle. Scale bar: 275  $\mu\text{m}$ .

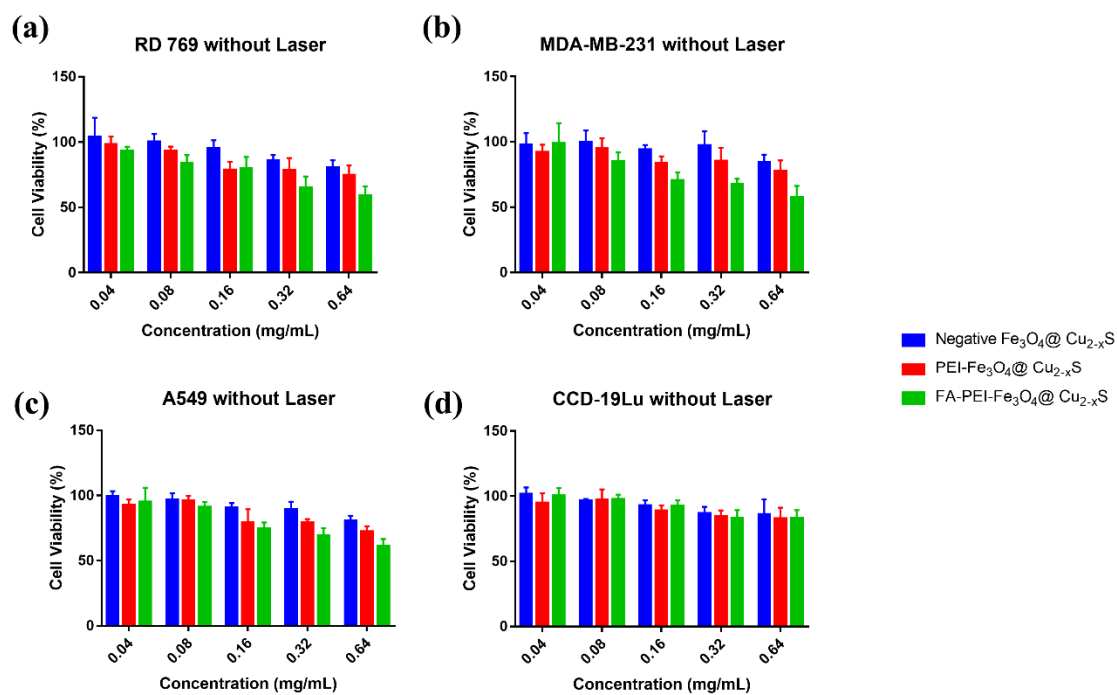

**Figure S6.** Cell viability vs. concentration of different nanoparticles for cancer cells (a) RD 769, (b) MDA-MB-231, (c) A549 and (d) non-malignant CCD-19Lu cells without laser treatment.
